# Supplementary material
Source: publisher figshare collection journal article supplement (https://frontiersin.figshare.com/ndownloader/files/22609142)
Supplement: Supplementary file [file 22609142]

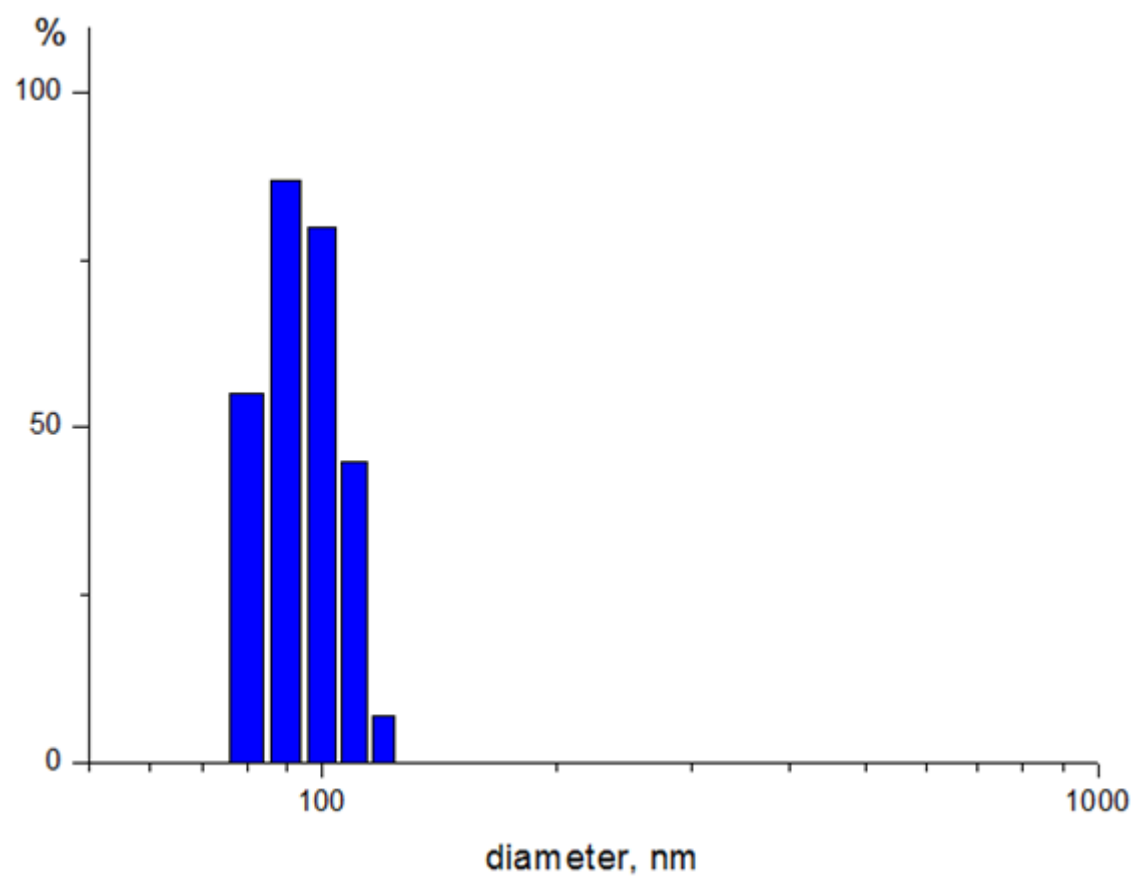

Supplementary data 2. The size distribution of UCNPs modified with PMAO-PEG shell ( $\zeta = -41.1$  mV) in the PBS buffer (pH 7.0).
